# Supplementary material for: A selective inhibitor of mitofusin 1-βIIPKC association improves heart failure outcome in rats
Source: PubMed Central journal article supplement (PMC6338754; doi:10.1038/s41467-018-08276-6), 2019-01-18
Supplement: 41467_2018_8276_MOESM3_ESM.pdf [file 41467_2018_8276_MOESM3_ESM.pdf]

## Reporting Summary

Nature Research wishes to improve the reproducibility of the work that we publish. This form provides structure for consistency and transparency in reporting. For further information on Nature Research policies, see [Authors & Referees](#) and the [Editorial Policy Checklist](#).

### Statistical parameters

When statistical analyses are reported, confirm that the following items are present in the relevant location (e.g. figure legend, table legend, main text, or Methods section).

n/a Confirmed

- The exact sample size ( $n$ ) for each experimental group/condition, given as a discrete number and unit of measurement
- An indication of whether measurements were taken from distinct samples or whether the same sample was measured repeatedly
- The statistical test(s) used AND whether they are one- or two-sided  
*Only common tests should be described solely by name; describe more complex techniques in the Methods section.*
- A description of all covariates tested
- A description of any assumptions or corrections, such as tests of normality and adjustment for multiple comparisons
- A full description of the statistics including central tendency (e.g. means) or other basic estimates (e.g. regression coefficient) AND variation (e.g. standard deviation) or associated estimates of uncertainty (e.g. confidence intervals)
- For null hypothesis testing, the test statistic (e.g.  $F$ ,  $t$ ,  $r$ ) with confidence intervals, effect sizes, degrees of freedom and  $P$  value noted  
*Give  $P$  values as exact values whenever suitable.*
- For Bayesian analysis, information on the choice of priors and Markov chain Monte Carlo settings
- For hierarchical and complex designs, identification of the appropriate level for tests and full reporting of outcomes
- Estimates of effect sizes (e.g. Cohen's  $d$ , Pearson's  $r$ ), indicating how they were calculated
- Clearly defined error bars  
*State explicitly what error bars represent (e.g. SD, SE, CI)*

*Our web collection on [statistics for biologists](#) may be useful.*

### Software and code

Policy information about [availability of computer code](#)

Data collection

Prism Graphad software version 6.0 or Microsoft Excel (v. 16) was used to collect the data.

Data analysis

Prism Graphad software version 6.0 was used to analyze the data. No custom software or code was used.

For manuscripts utilizing custom algorithms or software that are central to the research but not yet described in published literature, software must be made available to editors/reviewers upon request. We strongly encourage code deposition in a community repository (e.g. GitHub). See the Nature Research [guidelines for submitting code & software](#) for further information.

### Data

Policy information about [availability of data](#)

All manuscripts must include a [data availability statement](#). This statement should provide the following information, where applicable:

- Accession codes, unique identifiers, or web links for publicly available datasets
- A list of figures that have associated raw data
- A description of any restrictions on data availability

The statement is provided in the Method section.

## Field-specific reporting

Please select the best fit for your research. If you are not sure, read the appropriate sections before making your selection.

Life sciences  Behavioural & social sciences  Ecological, evolutionary & environmental sciences

For a reference copy of the document with all sections, see [nature.com/authors/policies/ReportingSummary-flat.pdf](https://www.nature.com/authors/policies/ReportingSummary-flat.pdf)

## Life sciences study design

All studies must disclose on these points even when the disclosure is negative.

|                 |                                                                                                                                                                                                                                                                                                                                                                                                                                                    |
|-----------------|----------------------------------------------------------------------------------------------------------------------------------------------------------------------------------------------------------------------------------------------------------------------------------------------------------------------------------------------------------------------------------------------------------------------------------------------------|
| Sample size     | No sample-size calculation was performed.                                                                                                                                                                                                                                                                                                                                                                                                          |
| Data exclusions | For animal studies, no animals were excluded from the study. For in vitro and cell-based assays, no data were excluded from the experiments and analysis.                                                                                                                                                                                                                                                                                          |
| Replication     | Most experiments in in vitro and cell-based assays were repeated in at least three independent experiments and the data were reproducible.                                                                                                                                                                                                                                                                                                         |
| Randomization   | For cell-based assays, cells were plated and distributed at equal density for treatment and control groups. The confluence of the cells at the time of treatment was noted to be equal and the allocation of treatment was randomly assigned.<br>For animal studies, Sham and myocardial infarction surgeries were done on the same day, usually 10 rats per day. Four weeks after myocardial infarction, rats were randomized to drug treatments. |
| Blinding        | For all cardiac function analysis in rats, the observer was blinded to treatment conditions.                                                                                                                                                                                                                                                                                                                                                       |

## Reporting for specific materials, systems and methods

### Materials & experimental systems

| n/a                                 | Included in the study                                           |
|-------------------------------------|-----------------------------------------------------------------|
| <input checked="" type="checkbox"/> | <input type="checkbox"/> Unique biological materials            |
| <input type="checkbox"/>            | <input checked="" type="checkbox"/> Antibodies                  |
| <input type="checkbox"/>            | <input checked="" type="checkbox"/> Eukaryotic cell lines       |
| <input checked="" type="checkbox"/> | <input type="checkbox"/> Palaeontology                          |
| <input type="checkbox"/>            | <input checked="" type="checkbox"/> Animals and other organisms |
| <input checked="" type="checkbox"/> | <input type="checkbox"/> Human research participants            |

### Methods

| n/a                                 | Included in the study                           |
|-------------------------------------|-------------------------------------------------|
| <input checked="" type="checkbox"/> | <input type="checkbox"/> ChIP-seq               |
| <input checked="" type="checkbox"/> | <input type="checkbox"/> Flow cytometry         |
| <input checked="" type="checkbox"/> | <input type="checkbox"/> MRI-based neuroimaging |

## Antibodies

### Antibodies used

Drp1 (clone), BD Biosciences, 611113, LOT 25726  
 GAPDH (6C5), Advanced Immunochemical, 6c5, LOT 13/06-III-G4C5  
 Mfn1 (3C9), Abnova, H00055669-M04, LOT 11284-3C9  
 Mfn2 (6A8), Abnova, H00009927-M01, LOT 11340-4H8  
 Opa1 (8A8) Abnova, H00004976-M01, LOT 10145-8A8  
 IDH2 (5F11), Abnova, H00003418-M01, LOT 11104-5F11  
 ATP5A (15H4C4), Abcam, Ab14748, LOT GR 209582-7  
 NDUFA9 (20C11B11B11), Abcam, Ab14713, LOT GR 200432-4  
 Ubiquinol (16D10AD9AH5), Abcam, Ab110252, LOT GR 47101-2  
 Troponin I, Abcam, Ab47003  
 SQSTM1/p62, Cell Signaling, 5114, LOT 4  
 Phospho-Troponin I (serine 23/24), Cell Signaling, 4004, LOT  
 Optineurin, Proteintech, 10837-1-AP, LOT 00049904  
 NDP52-CALCOCO2, Proteintech, 12229-1-AP, LOT 00040932  
 Fis1, Enzo Life Sciences, 210-907-R100, LOT L26384  
 αPKC (C-20), Santa Cruz biotechnology, sc-208, LOT L0811  
 βIPKC (C-16), Santa Cruz biotechnology, sc-209, LOT K1711  
 βIIPKC (C-18), Santa Cruz biotechnology, sc-210, LOT D2911  
 δPKC (C-17), Santa Cruz biotechnology, sc-213, LOT C2411  
 εPKC (C-15), Santa Cruz biotechnology, sc-214  
 RACK1 (H-187), Santa Cruz biotechnology, sc-10775

## Validation

Tom 20 (C-20), Santa Cruz biotechnology, sc-11415, LOT A3113  
 VDAC1 (D-16), Santa Cruz biotechnology, sc-32063, LOT L1212  
 Enolase (H-300), Santa Cruz biotechnology, SC-15343 LOT C1915  
 ALDH2 (3D12), Santa Cruz biotechnology, sc-1000496  
 Mfn1 (65), sc-50330, Santa Cruz biotechnology, LOT E1011

Drp1 (clone), BD Biosciences, 611113, LOT 25726 - Recommended for detection of Drp1 of mouse, rat, dog and human origin by WB and IF (citation: PMID: 20463395, PMID: 17003040, PMID: 17332775, PMID: 15979461, PMID: 17606867, PMID: 9472031).  
 GAPDH (6C5), Advanced Immunochemical, 6c5, LOT 13/06-III-G4C5 - Recommended for detection of GAPDH of mouse, rabbit, cat, rat, fish and human origin by WB, IHC and ELISA.  
 Mfn1 (3C9), Abnova, H00055669-M04, LOT 11284-3C9 - Recommended for detection of Mfn1 of human origin by WB and ELISA (citation: PMID: 28712724, PMID: 27050458, PMID: 28340937, PMID: 25336644, PMID: 24513856).  
 Mfn2 (6A8), Abnova, H00009927-M01, LOT 11340-4H8 - Recommended for detection of Mfn2 of human, mouse and rat origin by WB, IHC-P and ELISA (citation: PMID: 29464885, PMID: 29212658, PMID: 28698145, PMID: 25347680).  
 Opa1 (8A8) Abnova, H00004976-M01, LOT 10145-8A8 - Recommended for detection of Opa1 of mouse, rat and human origin by WB origin by WB and ELISA.  
 IDH2 (5F11), Abnova, H00003418-M01, LOT 11104-5F11 - Recommended for detection of IDH2 of human origin by WB, IHC-P and ELISA (citation: PMID: 26384468, PMID: 24164308).  
 ATP5A (15H4C4), Abcam, Ab14748, LOT GR 209582-7 - Recommended for detection of ATP5A of mouse, rat, cow, human, pig, caenorhabditis elegans, drosophila melanogaster and monkey origin by WB, ICC, IP, IHC-P, ICC/IF, Flow Cyt (citation: PMID: 27529784, PMID: 26824698).  
 NDUFA9 (20C11B11B11), Abcam, Ab14713, LOT GR 200432-4 - Recommended for detection of NDUFA9 of mouse, rat, cow, and human origin by WB, IHC-P, Flow Cyt (citation: PMID:28671271, PMID: 29780003).  
 Ubiquinol (16D10AD9AH5), Abcam, Ab110252, LOT GR 47101-2- Recommended for detection of Ubiquinol-Cytochrome C Reductase Core Protein I of mouse, rat, cow, and human origin by WB, ICC/IF, Flow Cyt (citation: PMID: 29222160, PMID: 29949756).  
 Troponin I, Abcam, Ab47003 - Recommended for detection of cardiac Troponin I of mouse, rat, human and pig origin by WB, IHC-P, ICC/IF, ELISA, Flow Cyt (citation: PMID: 29552383, PMID: 29593308).  
 SQSTM1/p62, Cell Signaling, 5114, LOT 4 - Recommended for detection of p62 of mouse, rat, human and monkey origin by WB (citation: PMID: 30364204, PMID: 30271755).  
 Phospho-Troponin I (serine 23/24), Cell Signaling, 4004 - Recommended for detection of Phospho-Troponin I of mouse, rat and human origin by WB (citation: PMID: 28469574, PMID: 28796250).  
 Optineurin, Proteintech, 10837-1-AP, LOT 00049904 - Recommended for detection of optineurin of mouse, rat and human origin by WB, IHC, IP, IF (citation: PMID: 26266977, PMID: 28294115, PMID: 26919428).  
 NDP52-CALCOCO2, Proteintech, 12229-1-AP, LOT 00040932 - Recommended for detection of CALCOCO2 of mouse, rat and human origin by WB, IHC, IP, IF (citation: PMID: 26919428, PMID: 26350966, PMID: 28965816).  
 Fis1, Enzo Life Sciences, 210-907-R100, LOT L26384 - Recommended for detection of Fis1 of mouse, rat and human origin by WB (citation: PMID: 28826719, PMID: 26014431, PMID: 25836420).  
 $\alpha$ PKC (C-20), Santa Cruz biotechnology, sc-208, LOT L0811 - Recommended for detection of  $\alpha$ PKC of mouse, rat and human origin by WB, IP, IF, ELISA (citation: PMID: 26926225, PMID: 26398746, PMID: 25761241).  
 $\beta$ IPKC (C-16), Santa Cruz biotechnology, sc-209, LOT K1711 - Recommended for detection of  $\beta$ IPKC of mouse, rat and human origin by WB, IP, IF, ELISA (citation: PMID: 25077539, PMID: 25292213).  
 $\beta$ IIPKC (C-18), Santa Cruz biotechnology, sc-210, LOT D2911 - Recommended for detection of  $\beta$ IIPKC of mouse, rat and human origin by WB, IP, IF, IHC-P, ELISA (citation: PMID: 26639163, PMID: 23778835, PMID: 22730532).  
 $\delta$ PKC (C-17), Santa Cruz biotechnology, sc-213, LOT C2411 - Recommended for detection of  $\delta$ IIPKC of mouse, rat and human origin by WB, IP, IF, IHC-P, ELISA (citation: PMID:24828530, PMID: 26769967, PMID: 23845726).  
 $\epsilon$ PKC (C-15), Santa Cruz biotechnology, sc-214 - Recommended for detection of  $\epsilon$ IIPKC of mouse, rat, human and avian origin by WB, IP, IF, IHC-P, ELISA (citation: PMID: 26769967, PMID: 25778903, PMID: 29439667).  
 RACK1 (H-187), Santa Cruz biotechnology, sc-10775 - Recommended for detection of RACK1 of mouse, rat, human and avian origin by WB, IP, IF, IHC-P (citation: PMID: 22903704, PMID: 19158384, PMID: 16849317).  
 Tom 20 (C-20), Santa Cruz biotechnology, sc-11415, LOT A3113 - Recommended for detection of Tom 20 of mouse, rat, human and avian origin by WB, IP, IF, IHC-P (citation: PMID: 27390127, PMID: 26119781, PMID: 25997101).  
 VDAC1 (D-16), Santa Cruz biotechnology, sc-32063, LOT L1212 - Recommended for detection of VDAC1 of mouse, rat, human and avian origin by WB, IP, IF, IHC-P, ELISA (citation: PMID: 23376484, PMID: 21470976, PMID: 18068667).  
 Enolase (H-300), Santa Cruz biotechnology, SC-15343, LOT C1915 - Recommended for detection of enolase of mouse, rat and human origin by WB, IP, IF and IHC (citation: PMID 26268247, PMID 26025878, PMID 25053255, PMID 23589302, PMID 22272336, PMID 22354986, PMID 21779095, PMID 21307348, PMID 23885189, PMID 20217863).  
 ALDH2 (3D12), Santa Cruz biotechnology, sc-1000496 - Recommended for detection of ALDH2 of mouse, rat and human origin by WB, IP, ELISA (citation: PMID: 30015964, PMID: 25406860, PMID: 28962150).  
 Mfn1 (H65), sc-50330, Santa Cruz biotechnology, LOT E1011 - Recommended for detection of Mfn1 of mouse, rat and human origin by WB, IP, IF, IHC-P, ELISA (citation: PMID: 26538029, PMID: 25060553, PMID: 25147362).

## Eukaryotic cell lines

Policy information about [cell lines](#)

## Cell line source(s)

MEF (mouse embryonic fibroblasts). WT (ATCC CRL-2991) and Mfn1 knockout (ATCC CRL-2992) MEFs were acquired from ATCC and cultured in Dulbecco's Modification of Eagle's Medium/Ham's F-12 50/50 Mix supplemented with 10% FBS, 100 U mL<sup>-1</sup> penicillin, and 100 ug mL<sup>-1</sup> streptomycin.

## Authentication

None of the cell lines used were authenticated.

## Mycoplasma contamination

Cell lines were not tested for mycoplasma contamination.

Commonly misidentified lines  
(See [ICLAC](#) register)

We did not use any commonly misidentified cell lines.

## Animals and other organisms

---

Policy information about [studies involving animals](#); [ARRIVE guidelines](#) recommended for reporting animal research

Laboratory animals

Male Wistar Rats (12-22 weeks old) were maintained in a 12:12 h light-dark cycle and temperature-controlled environment (22 °C) with free access to standard laboratory chow and tap water.

Wild animals

The study did not involve wild animals.

Field-collected samples

The study did not involve field-collected samples.
